# Supplementary material
Source: PubMed Central journal article supplement (PMC4327767)
Supplement: NIHMS594171-supplement-1.pdf [file NIHMS594171-supplement-1.pdf]

**Title:** Functional organization of glomerular maps in the mouse accessory olfactory bulb

**Authors:** Gary F. Hammen, Diwakar Turaga, Timothy E. Holy, and Julian P. Meeks

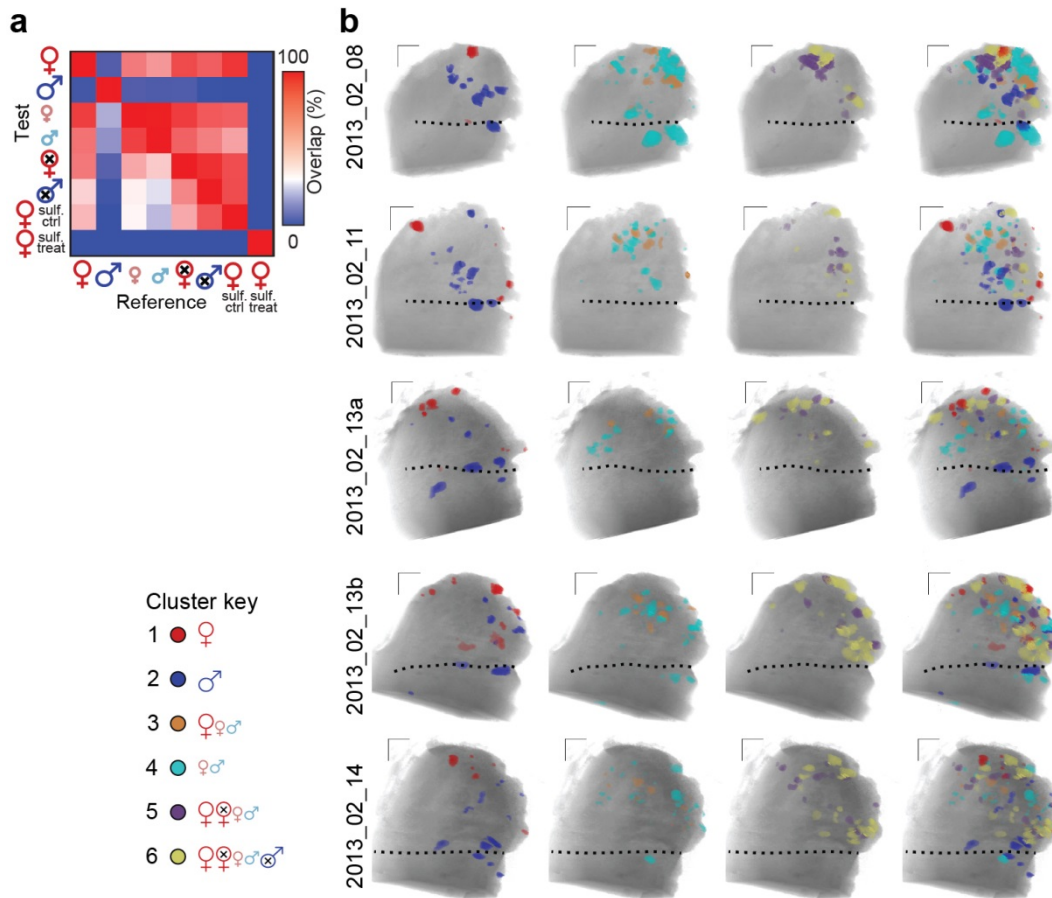

**Supplementary Figure 1)** Response overlap and spatial distribution of urine-responsive glomeruli **(a)** Pairwise comparison matrix for the overlapping ROI volume between all tested urine sources ( $\Delta F/F$  2%). Columns represent the reference groups and rows represent the test groups. Note: sulfatase-treated adult female urine (final row/column) activated extremely few glomeruli at this threshold. **(b)** Urine-selective glomerular maps for 5 experimental animals. Each glomerulus is colored using the strategy indicated in Figure 3f. The first column shows maps for clusters 1 and 2, the second 3 and 4, and the third 5 and 6. The smallest clusters, Clusters 7 and 8 are omitted from this figure. The right-most column shows clusters 1-6. Figure 3a displays experiment “2013\_02\_14,” Figure 3g displays experiments “2013\_02\_13a” and “2013\_02\_14,” and Figure 4 displays experiment “2013\_02\_13b.” Dotted lines indicate the position of the *linea alba*. Scale bars: 100  $\mu$ m.

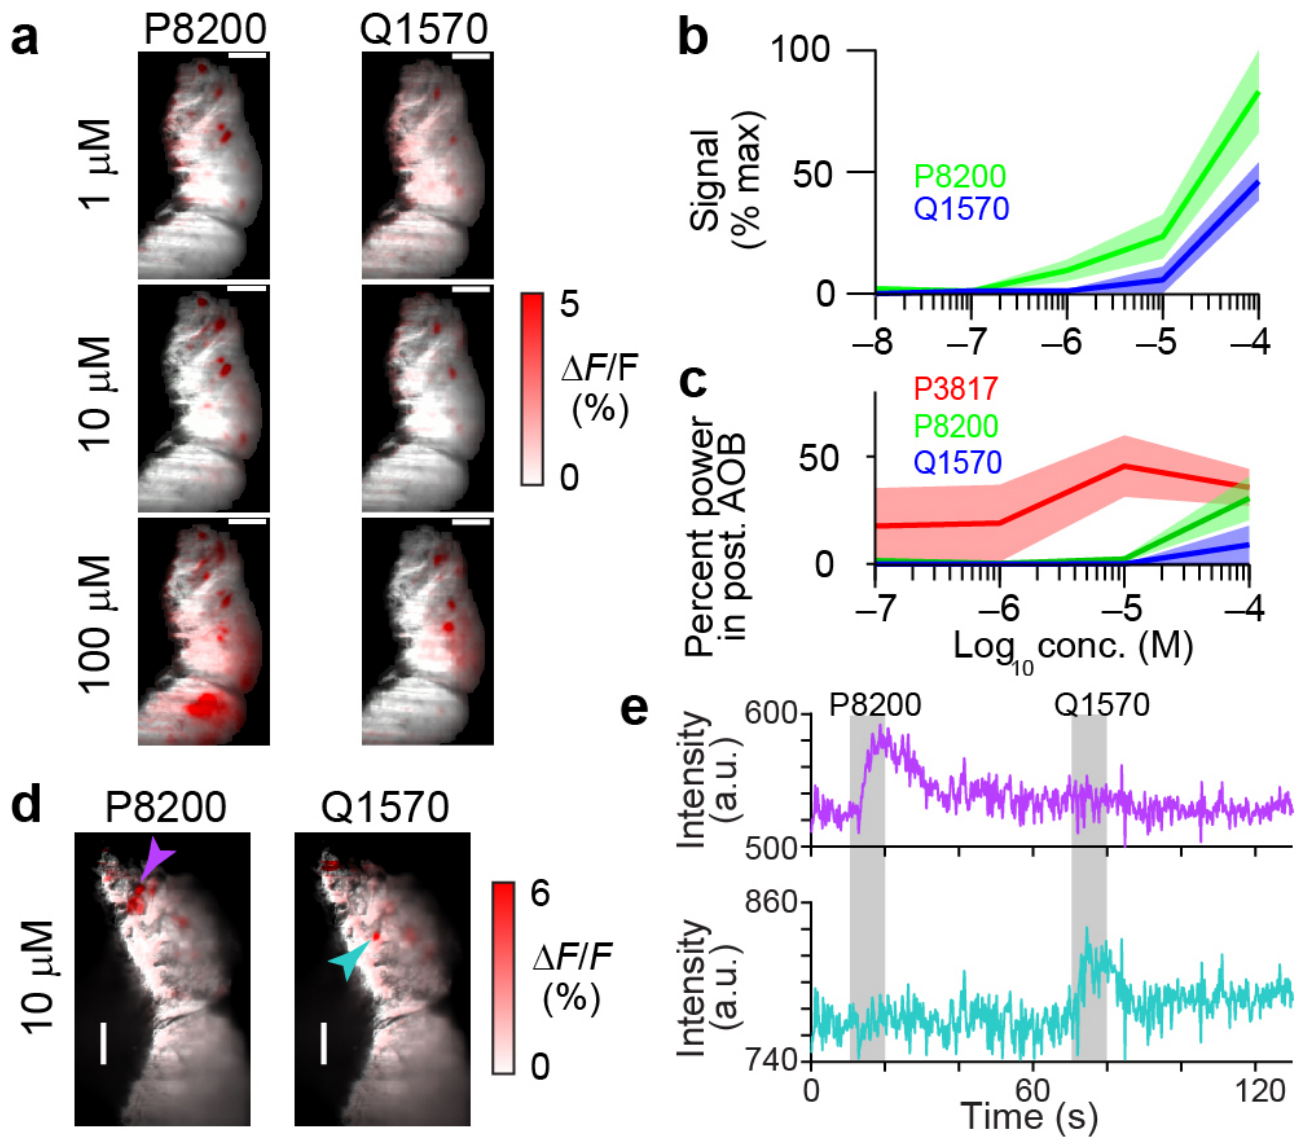

**Supplementary Figure 2**) Sulfated steroid glomerular activity across concentrations and at fast time scales. **(a)** Stimulation of the VNO with 1, 10, or 100  $\mu$ M P8200 or Q1570 resulted in increased fluorescent intensity and number of active glomeruli. At 100  $\mu$ M, the activity increased dramatically, making discrimination of individual glomeruli more difficult. Scale bars 100  $\mu$ m. **(b)** Percentage of signal strength (sum of suprathreshold  $\Delta F/F$  intensity, normalized per experiment) for each steroid across 5 log orders of concentration. Shaded areas represent mean  $\pm$  standard error of the mean across multiple experiments (P8200, N = 4; Q1570, N = 2). **(c)** At higher steroid concentrations, the number of steroid-responsive glomeruli in the pAOB increased for all steroids. Posterior AOB glomeruli responsive to sulfated pregnanolone P3817 were evident at lower concentrations. **(d)** Average change in fluorescence during stimulation during continuous 10 Hz imaging of a single frame. Colored arrowheads indicate the location of two glomeruli analyzed in **e**. Scale bars 100  $\mu$ m. **(e)** Intensity changes in glomeruli indicated by the colored arrowheads in **d**. Stimuli were delivered for 10 s (gray regions).

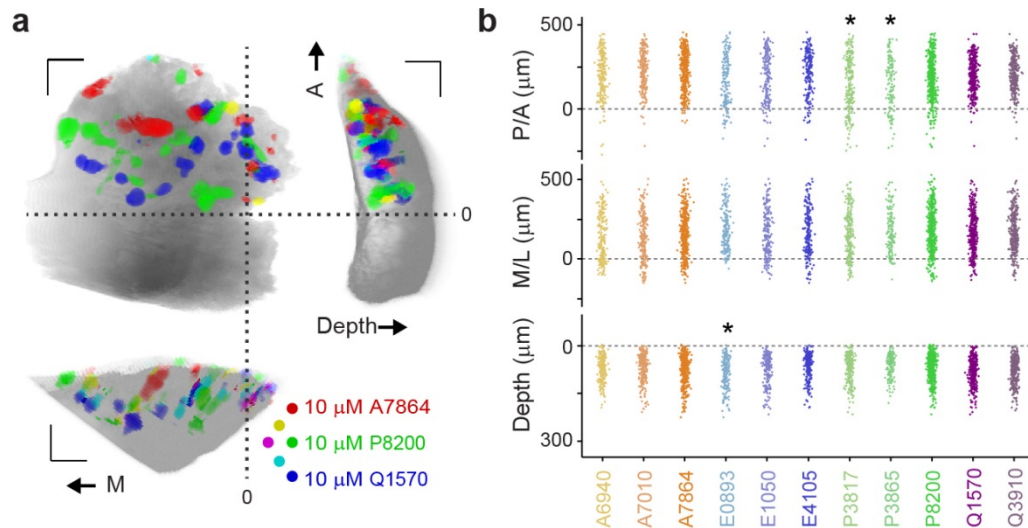

**Supplementary Figure 3)** Absolute positions of sulfated steroid-responsive ROIs and pAOB responses to sulfated pregnanolones. **(a)** Orthogonal plot of views of the AOB as visualized from the surface (top-left), posterior (bottom) and lateral (right) viewpoints. The color of the glomeruli reflects their responsivities (threshold  $\Delta FF > 1\%$ ). Yellow, magenta, and cyan regions indicate glomeruli responding to more than one steroid at this threshold. **(b)** Aggregated position information for all 1078 steroid-responsive ROIs along each of the 3 orthogonal coordinates at  $\Delta FF > 1\%$  ( $n = 10$ ). The dotted line along the medial/lateral (M/L) and posterior/anterior (P/A) axes refers to their position relative to the landmarks indicated by dotted lines in **a**. Depth was measured relative to the actual tissue surface. Asterisks denote populations which were statistically different than the majority of the other populations ( $p < 0.05$ , one-way ANOVA).

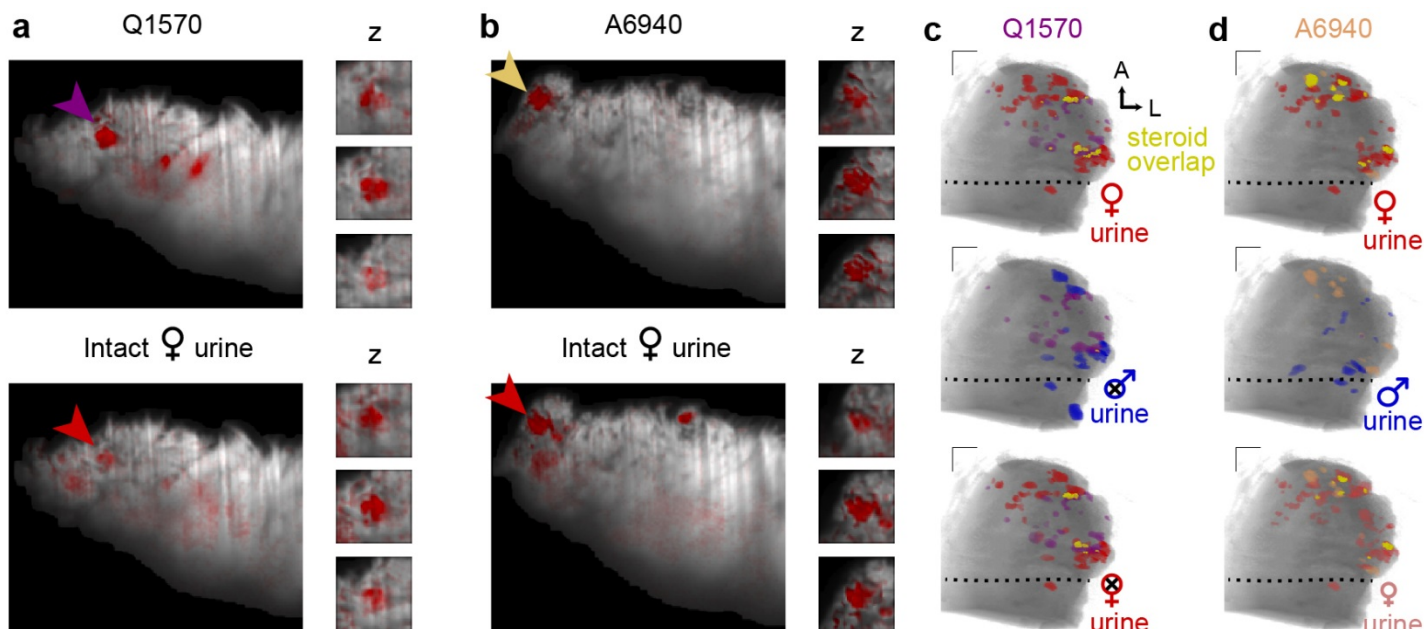

**e** Steroid - urine overlap from VSNs (Meeks *et al*, 2010)

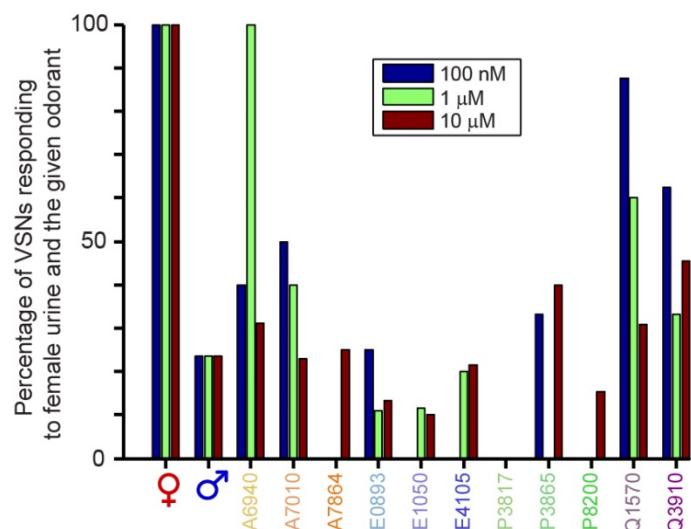

**f** Steroid – urine overlap in AOB glomerular layer

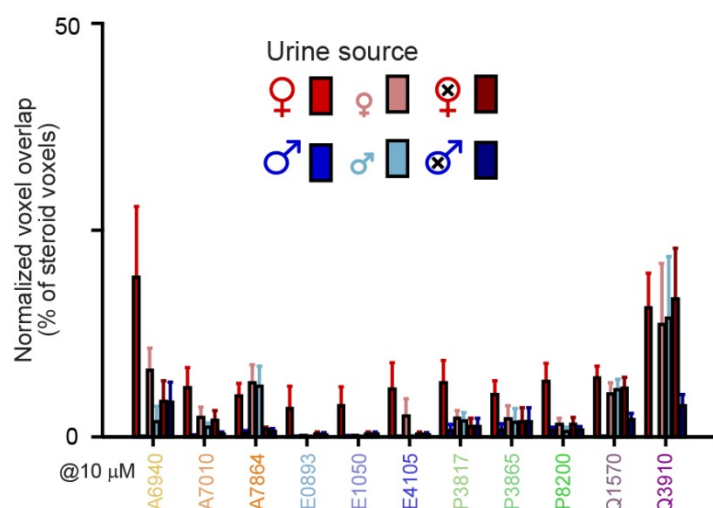

**Supplementary Figure 4**) VSN co-activation by sulfated steroids and intact BALB/c female urine. **(a-b)** Several aAOB glomeruli were co-activated by 1:100 intact adult BALB/c female urine (bottom, red arrowheads) and 10 μM Q1570 (purple arrowhead, **a**) or 10 μM epitestosterone sulfate (A6940, yellow arrowhead, **b**). Right insets in **a** and **b** show single responses of the indicated glomeruli across 3 consecutive frames of the stack at higher zoom (image size 35 μm square). **(c-d)** Rendered maps of glomerular ROIs responding to 10 μM Q1570 (**c**, purple) or A6940 (**d**, orange). Steroid-responsive maps are overlaid on glomerular ROIs responsive to 1:100 dilutions of the indicated urines ( $\Delta F/F > 2\%$ ) with overlapping voxels labeled yellow. All scale bars 100 μm. A: anterior, L: lateral. **(e)** The number of VSNs responding to sulfated steroids and 1:100 BALB/c female urine as measured on multielectrode arrays ( $p < 0.05$  Wilcoxon rank-sum test, firing rate change  $> 1$  Hz compared to controls; Meeks *et al*, 2010). These estimates are normalized to the total number of neurons responsive to the steroid at each concentration or 1:100 urine (left-most plots). Note the concentration-dependent decrease in the percentage of co-responsive neurons for Q1570. Because nearly all 100 nM Q1570-responsive VSNs also respond to BALB/c female-urine, this would be consistent with an endogenous concentration of Q1570 in BALB/c female urine of 1 to 10 μM (100 x [10 to 100 nM]), consistent with estimates from Nodari *et al*, 2008. **(f)** The percentage of steroid-responsive voxels that overlapped urine-responsive voxels (N = 7 for intact adult urines, N = 4 for all others). **(f)** Normalized voxel overlap between steroid-responsive glomeruli and mouse urine across sex and sexual maturity. Error bars reflect s.e.m.



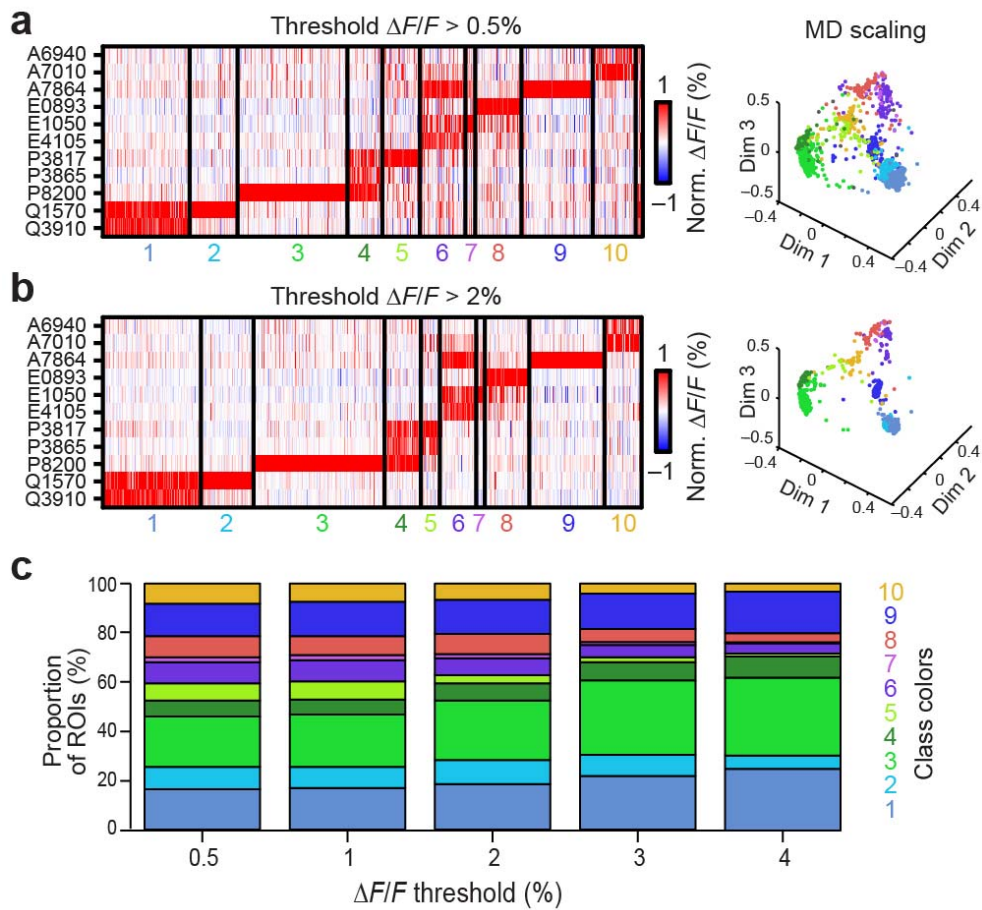

**Supplementary Figure 5**) ROI functional clusters across threshold. **(a-b)** Plots of the normalized  $\Delta F/F$  for all ROIs across all experiments (N = 10). Each colorized column represents 1 ROI. The order of the ROIs within each cluster grouping (delineated by vertical black bars) was randomized. Insets to the right of each plot show the first 3 multidimensional scaling dimensions from independent clustering runs. The color of each point matches the VSN class color values in **c**. **(c)** Proportion of total ROIs in each cluster across all thresholds tested. Colorized list at right indicates the color assigned to each VSN class.

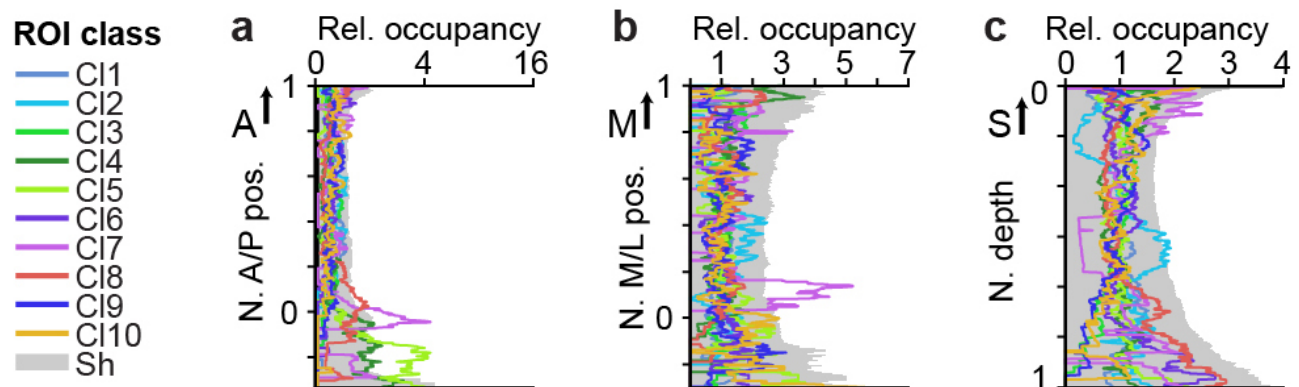

**Supplementary Figure 6**) Absolute positions of steroid-responsive glomerular classes. (a-c) Plots of ROI relative occupancy by steroid-responsive glomerular class ( $n = 10$ , cluster definitions shown in Fig. 6b). The observed relative occupancy of glomeruli of each class (solid colored lines) was compared to the 95<sup>th</sup> percentile (gray shaded region) from shuffled maps (100,000 shuffle tests per experiment,  $n = 10$  experiments). Lines exceeding the shaded regions indicate preferential occupancy of particular positions by glomeruli of that class.
